# Supplementary material
Source: publisher figshare collection journal article supplement (https://acs.figshare.com/ndownloader/files/20178587)
Supplement: Supplementary file 1 [file 20178587]

# Supporting Information

## Ultrathin All-2D Lateral Graphene:GaS:Graphene UV Photodetectors by Direct CVD Growth

*Tongxin Chen,<sup>1</sup> Yang Lu,<sup>1</sup> Yuewen Sheng,<sup>1</sup> Yu Shu,<sup>1</sup> Xuan Li,<sup>1</sup> Ren-Jie Chang,<sup>1</sup> Harish Bhaskaran,<sup>1</sup>*

*Jamie H. Warner<sup>1\*</sup>*

<sup>1</sup>Department of Materials, University of Oxford, Parks Road, Oxford, OX1 3PH, United  
Kingdom

\*[Jamie.Warner@materials.ox.ac.uk](mailto:Jamie.Warner@materials.ox.ac.uk)

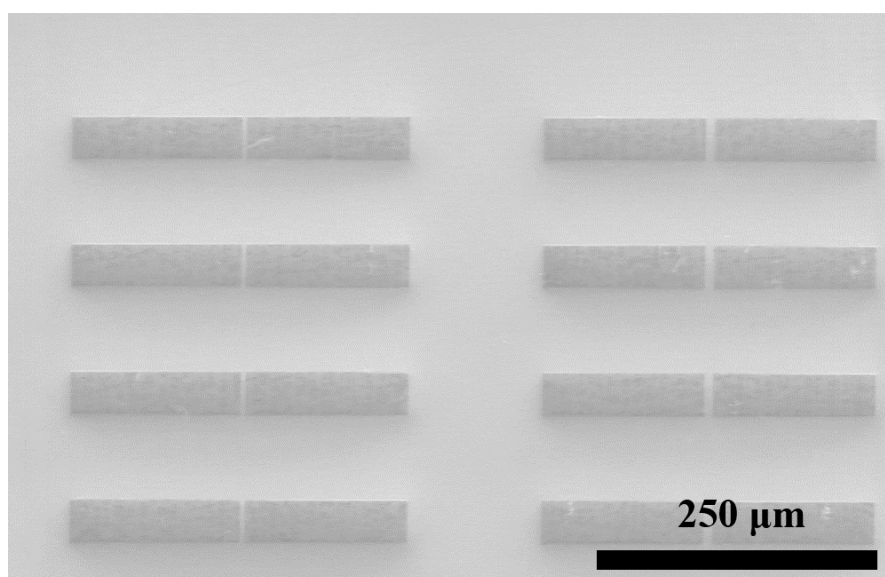

**Figure S1. SEM image of as patterned graphene electrode pair array**

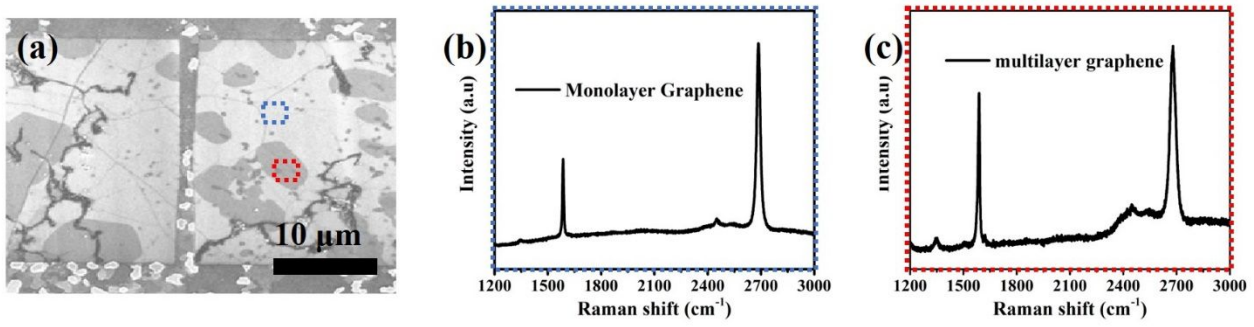

**Figure S2. Raman spectra of graphene of Gr/GaS/Gr heterostructures** (a) SEM image of a Gr/GaS/Gr photodetectors made by CVD growth on pre-patterned graphene gap; (b) Raman spectrum of graphene in highlighted area (blue); (c) Raman spectrum of graphene in highlighted area (red).

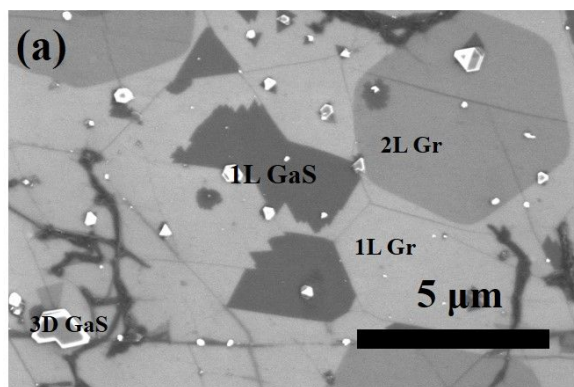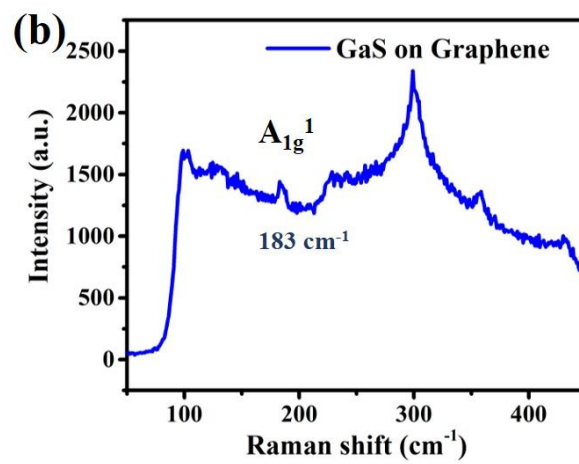

**Figure S3. CVD growth of GaS on graphene substrate.** (a) SEM image of GaS CVD grown on graphene substrate.

(b) Raman spectrum of GaS grown on graphene substrate.

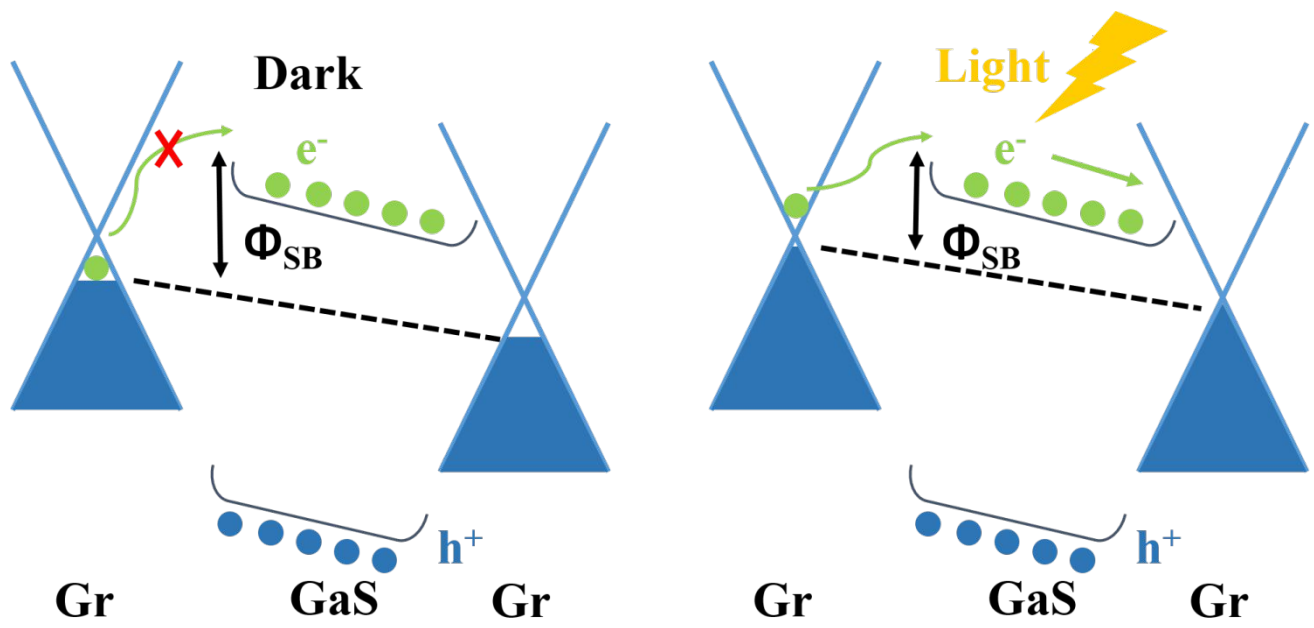

Figure 4S. Band diagram of graphene:GaS:graphene heterojunction under dark and illumination
